# Supplementary material for: An efficient oxygen reduction electrocatalyst from graphene by simultaneously generating pores and nitrogen doped active sites
Source: Royal Society of Chemistry journal article supplement (doi:10.1039/c2jm35128e), 2012-01-01
Supplement: c2jm35128e.pdf [file c2jm35128e.pdf]

## Supporting Information

# Efficient oxygen reduction electrocatalyst from graphene by simultaneously generating pores and nitrogen doped active sites

*Thangavelu Palaniselvam, Harshitha Barike Aiyappa and Sreekumar Kurungot\**

*Physical and Materials Chemistry Division, National Chemical laboratory, Pune-411008,  
India. [Emai:k.sreekumar@ncl.res.in](mailto:Emai:k.sreekumar@ncl.res.in)*

## Results

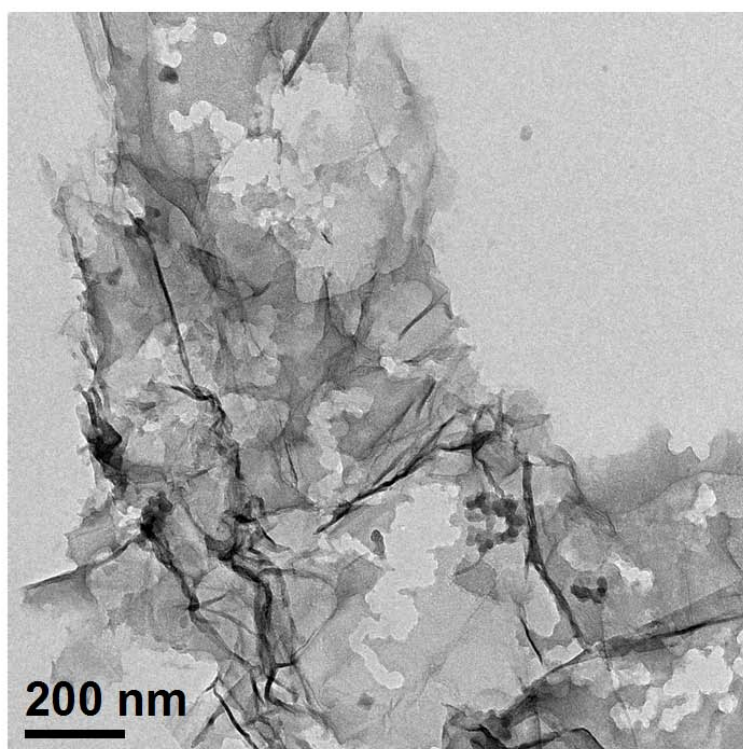

Fig. S1: HRTEM image of the porous graphene derived from larger and aggregated  $\text{Fe}_2\text{O}_3$  particles.

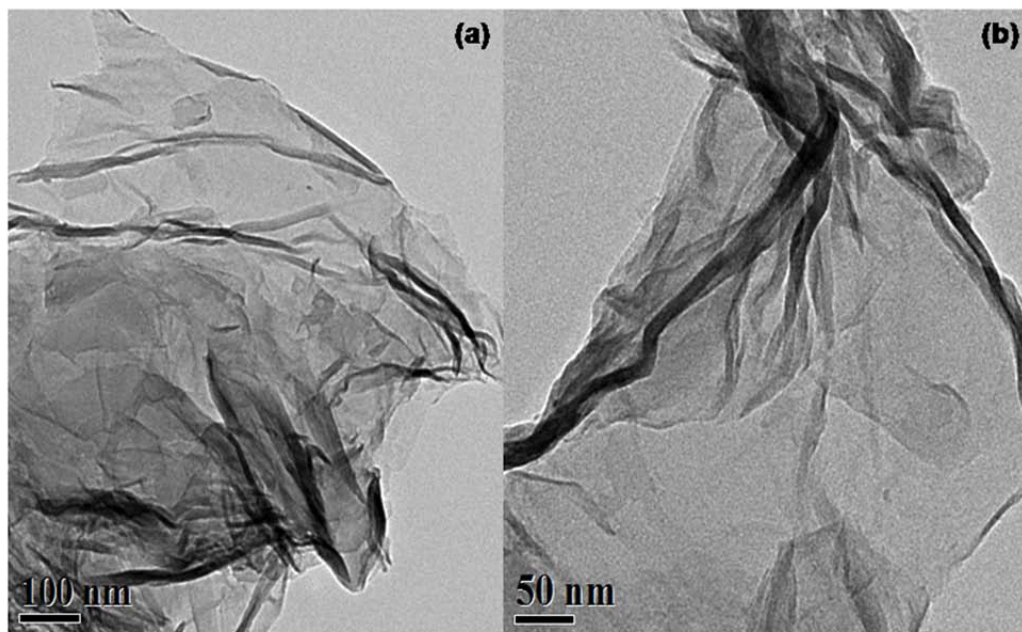

*Fig. S2. HRTEM images of the nitrogen doped graphene (N-Gr). The sample was prepared by avoiding the Fe precursor during the pyrolysis step.*

The HRTEM images of N-Gr (shown in Fig. S2) clearly show the few-layer nitrogen doped Gr, where the graphene layers are stacked together. There are no indications of the formation of pores in these samples due to the absence of the Fe precursor in the preparation process.

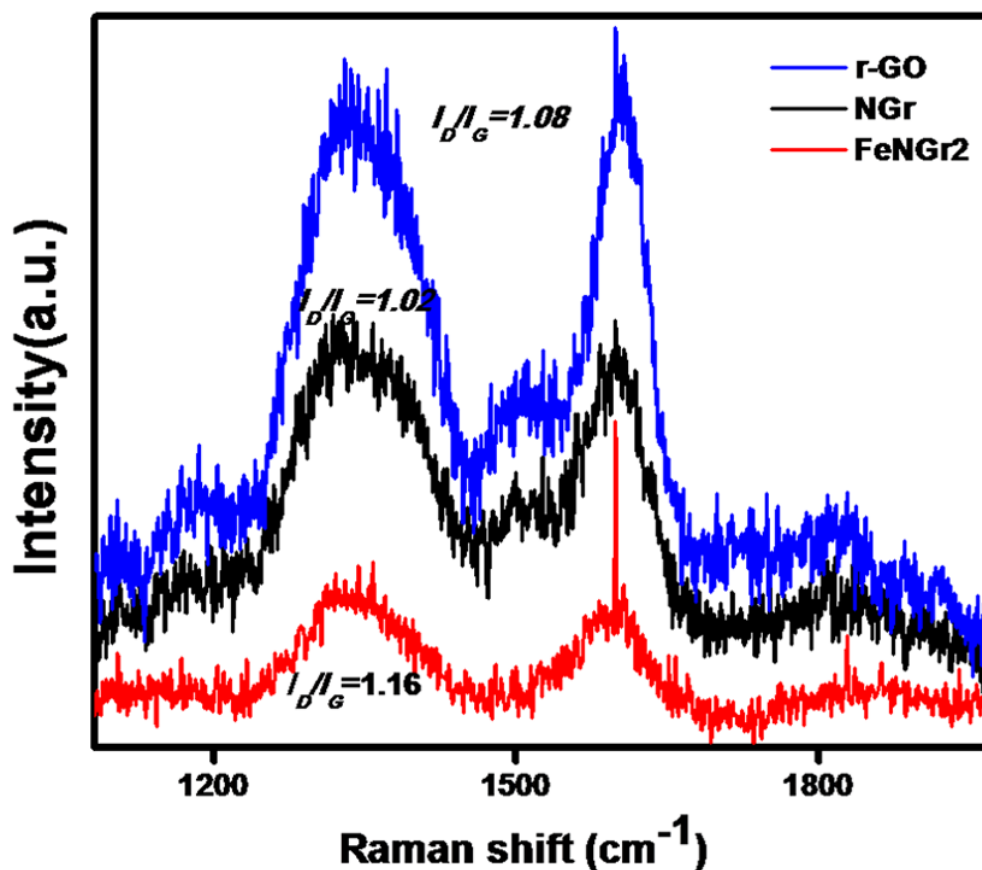

Fig. S3 . Raman spectra of r-GO, N-Gr and FeNGr2.

Since Raman spectroscopy is an important tool to deduce the structure in particularly defects and disorder nature of Gr based materials, we took Raman spectra of all the samples (Fig. S3). The Raman spectra of the samples exhibit two remarkable peaks at around 1340 and 1506 cm<sup>-1</sup> corresponding to the well defined D band and G band, respectively. The graphitic peak (G band) at 1506-1510 cm<sup>-1</sup> is due to the E<sub>2g</sub> vibrational mode of the C-C bond stretching and the disorder peak (D-band) at 1330-1345 cm<sup>-1</sup> is due to the A<sub>1g</sub> vibrational mode. The intensity ratio of the D and G bands *i.e* (I<sub>D</sub>/I<sub>G</sub> ratio) helps to estimate the defects of Gr based samples where a higher ratio ensures more defects on Gr. The calculated I<sub>D</sub>/I<sub>G</sub> ratios of r-GO, N-Gr and FeNGr2 are 1.08, 1.02, and 1.16 respectively. The higher I<sub>D</sub>/I<sub>G</sub> ratio of FeNGr2 compared to the other nitrogen based Gr materials clearly depicts the defective

nature of FeNGr2 due its porous structure. This conclusion is well in agreement with the conclusions derived from the XRD, XPS and HRTEM analyses.

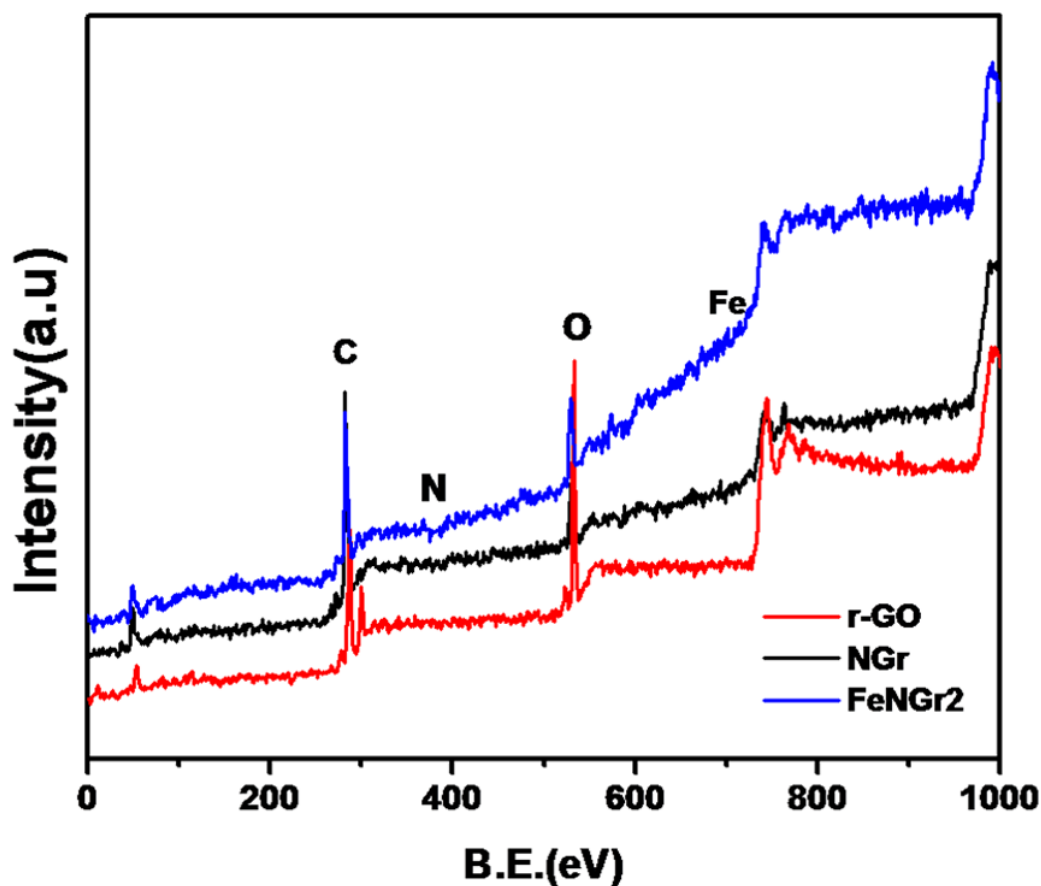

Fig. S4. Full range XPS survey of (a) r-GO (b) N-Gr and (c) FeNGr2

The elemental surface compositions r-GO, N-Gr and FeNGr2 were evaluated using XPS. The full range XPS survey spectra of r-GO, N-Gr and FeNGr2 are shown in Fig. S4, which clearly show the presence of carbon (C), oxygen ( $O_2$ ), nitrogen ( $N_2$ ), and iron (Fe). The main peak at 284.3 eV is due to the  $sp^2$ -carbon, which indicates the predominant graphitic nature of the carbon. The additional peaks at 398, 532 and 702 eV correspond to  $N_2$ ,  $O_2$  and Fe respectively. The peak for  $O_2$  arises mainly due to the  $O_2$  functional groups at the surface of the basal plane of Gr.

### EDAX analysis

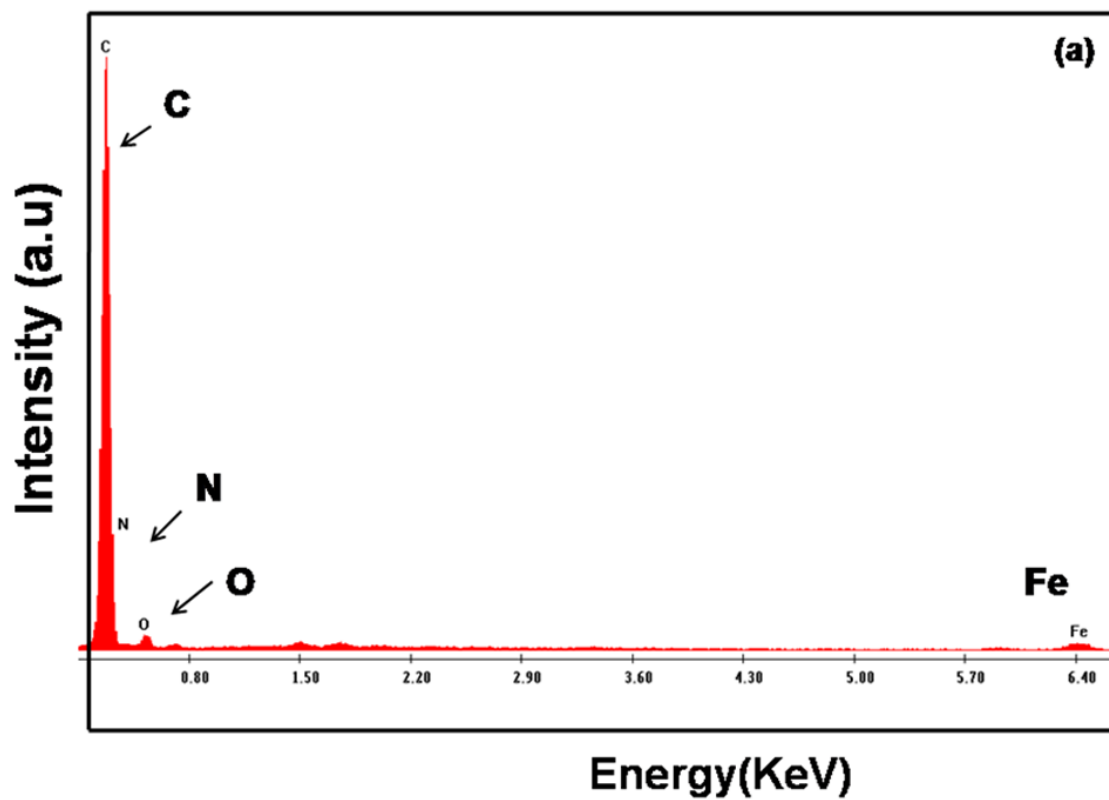

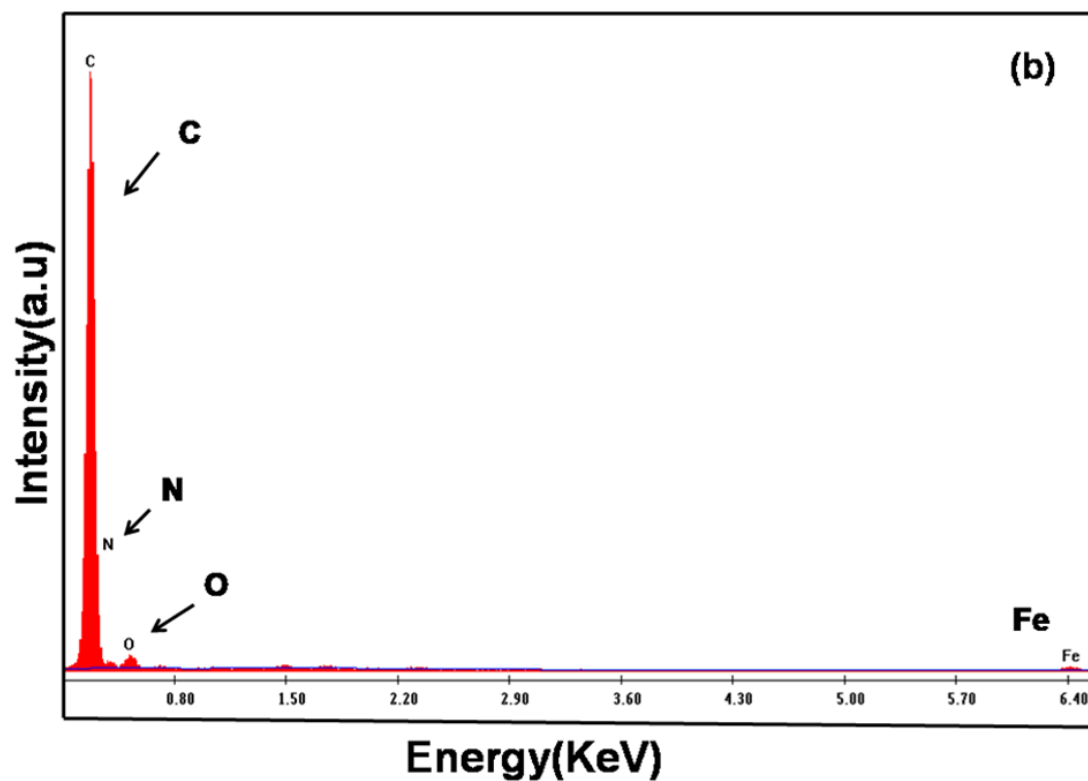

Fig. S5. EDAX spectra of (a) FeNGr2 and (b) FeNGr3 showing 5.9 and 9.75 % of nitrogen doping, respectively.

### *EDAX quantification of FeNGr2*

| Elem  | Wt %   | At %   | K-Ratio | Z      | A      | F      |
|-------|--------|--------|---------|--------|--------|--------|
| C K   | 88.11  | 90.85  | 0.7458  | 1.0028 | 0.8440 | 1.0001 |
| N K   | 5.92   | 5.24   | 0.0046  | 0.9948 | 0.0783 | 1.0001 |
| O K   | 4.70   | 3.64   | 0.0055  | 0.9876 | 0.1184 | 1.0000 |
| FeK   | 1.26   | 0.28   | 0.0111  | 0.8432 | 1.0425 | 1.0000 |
| Total | 100.00 | 100.00 |         |        |        |        |

## EDAX quantification of FeNGr3

| Elem  | Wt %   | At %   | K-Ratio | Z      | A      | F      |
|-------|--------|--------|---------|--------|--------|--------|
| C K   | 83.94  | 86.82  | 0.7031  | 1.0025 | 0.8354 | 1.0001 |
| N K   | 9.75   | 8.65   | 0.0079  | 0.9945 | 0.0819 | 1.0001 |
| O K   | 5.64   | 4.38   | 0.0065  | 0.9873 | 0.1169 | 1.0000 |
| FeK   | 0.66   | 0.15   | 0.0058  | 0.8429 | 1.0425 | 1.0000 |
| Total | 100.00 | 100.00 |         |        |        |        |

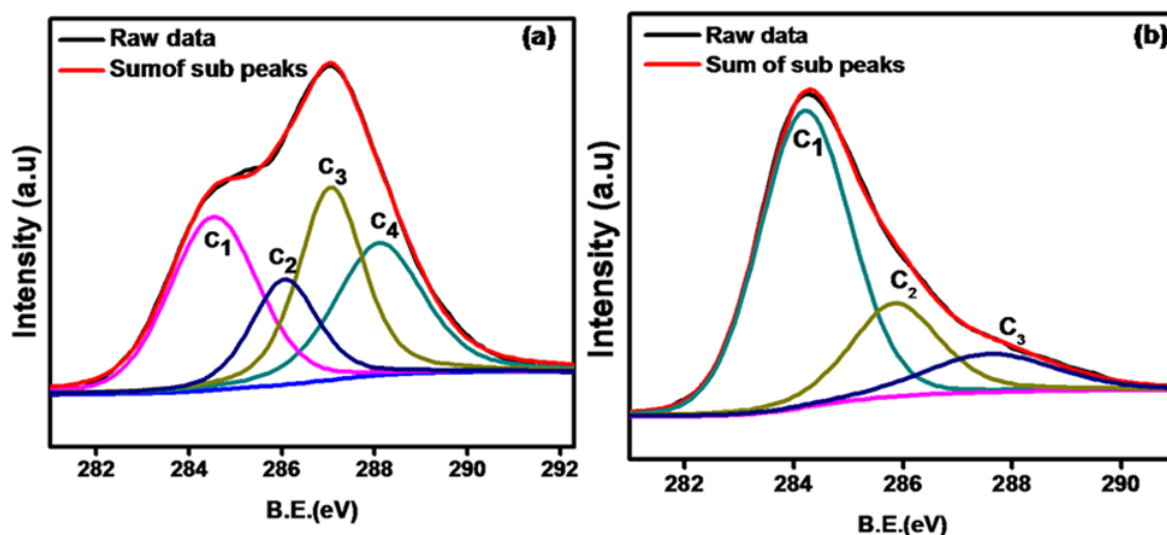

Fig. S6. C 1s spectra of (a) r-GO and (b) FeNGr2.

The C1s spectra of r-GO and FeNGr2r are shown in Fig. S6. The C1s spectra of r-GO (Fig. S6a) are deconvoluted into four different peaks. The peak at 284.5 eV is assigned as C<sub>1</sub> corresponding to graphitic carbon. The peaks at 286.7, 287.1 and 288.1 eV can be recognized as C<sub>2</sub>, C<sub>3</sub> and C<sub>4</sub> are corresponding to the sp<sup>3</sup> carbon (*i.e.* carbon bound with oxygen (C-O)), epoxy carbon (C-O-C) and carbonyl carbon (C=O) respectively. Similarly, in the case of

FeNGr2 (Fig. S6b), the C1s spectra are deconvoluted into three peaks. The peak at 284.3, 285.7 and 287.5 eV are corresponding to the graphitic carbon, C-O and sp<sup>3</sup> carbon (either carbon bound with oxygen or nitrogen) and epoxy carbon respectively. Fig. S6b also reveals strong suppression of the oxygen functional groups especially carbonyl functional groups compared to r-GO which ensures the proficient reduction of the oxygen functional groups during the thermal treatment.

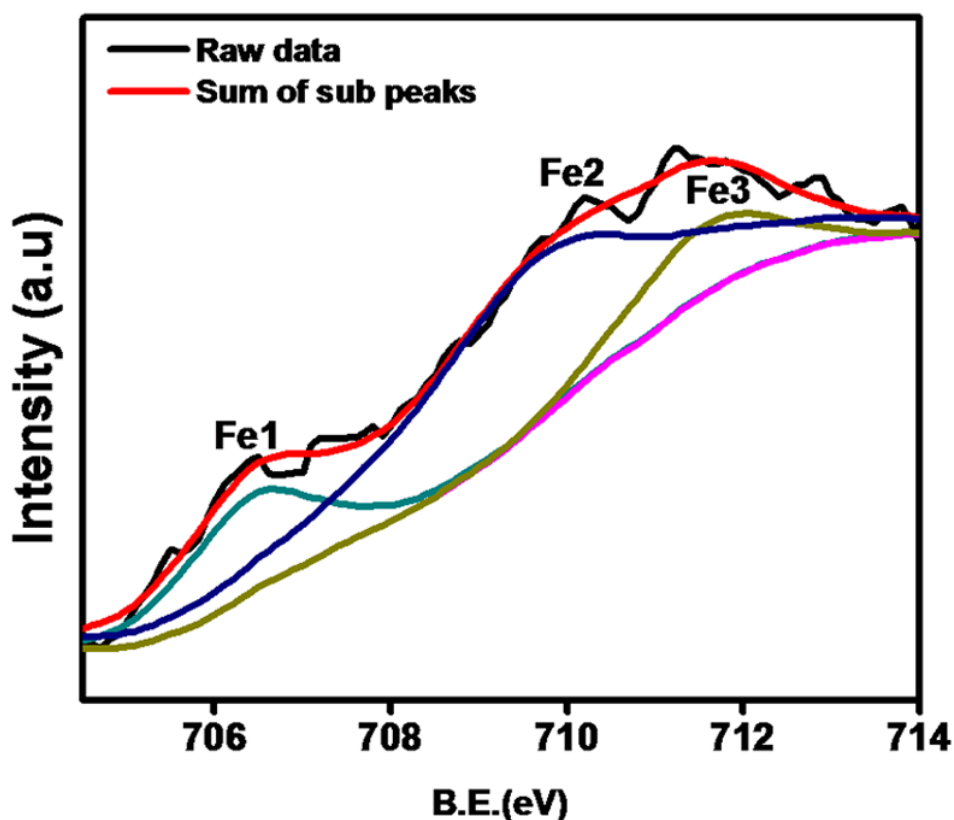

*Fig. S7. Fe2p spectra of FeNGr2.*

The Fe2p spectra of FeNGr2 have been deconvoluted into three different peaks which are shown in Fig. S7. The peak at the low binding energy of 706.6 eV, named as Fe1, corresponds to metallic iron carbide (Fe<sub>2</sub>p<sub>3/2</sub>) emphasizing the presence of trace amount of Fe<sub>3</sub>C which is well line up with the XRD results. The pair of peaks at 709.8.0 and 711.8 e V which are assigned as Fe2 and Fe3, respectively, correspond to the ionic state of Fe (Fe<sub>2</sub>p<sub>1/2</sub>)



and this result discloses that Fe in the ionic state arises either from the iron coordinated with nitrogen or residual iron oxide.

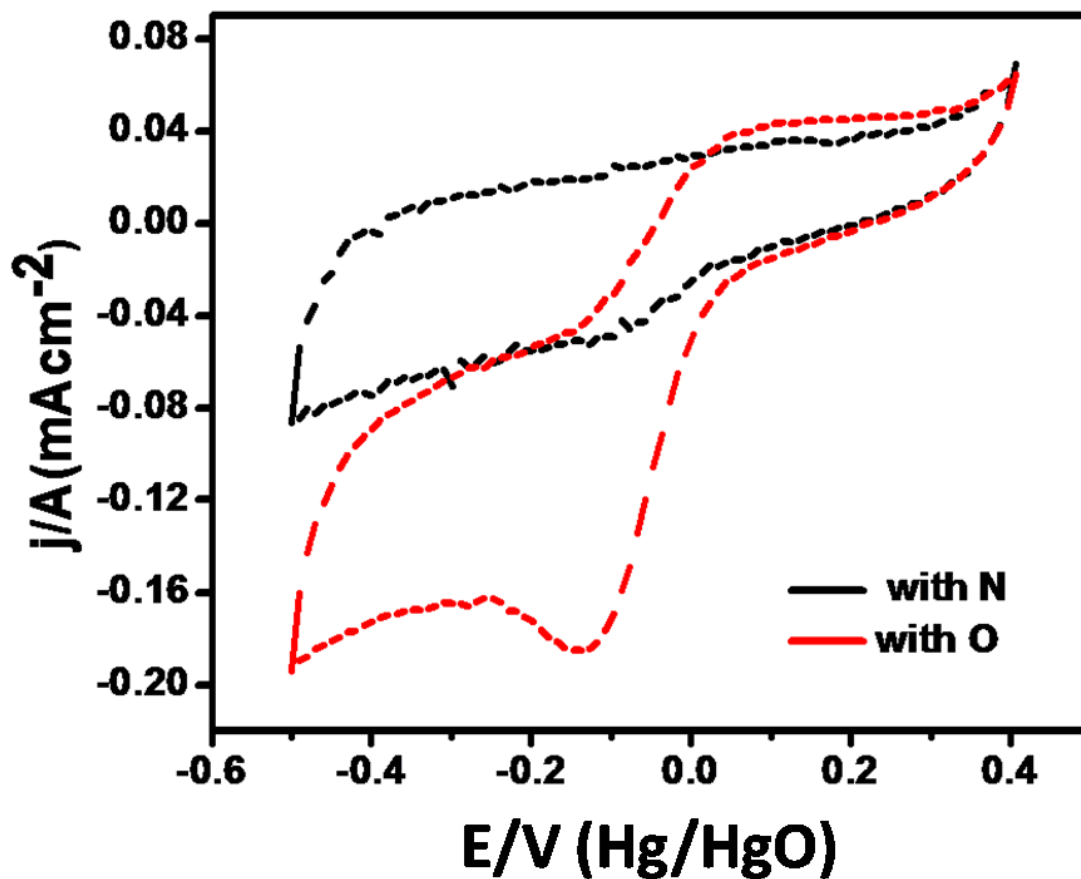

Fig. S8. CV for N-Gr recorded in 0.1 KOH at a scan rate of 5 m V/s under nitrogen and oxygen enriched conditions.

Fig. S8 shows the cyclic voltammograms of N-Gr) cycled between 0.4 V to -0.5 V against Hg/HgO reference electrode at a scan rate of 5 mV/s under nitrogen and oxygen enriched conditions. As can be seen, NGr shows well resolved cathodic peak corresponding to ORR under oxygen saturated conditions.

Table S1. Summary of performance of nitrogen doped catalysts.

| <b>Authors</b>                        | <b>Preparation method</b>                             | <b>N content %</b> | <b>No of electron transfer</b> | <b>Overpotential difference (mV)</b> |
|---------------------------------------|-------------------------------------------------------|--------------------|--------------------------------|--------------------------------------|
| <b>Wong <i>et al</i><sup>31</sup></b> | <b>Thermal annealing</b>                              | <b>8.1</b>         | <b>3.3</b>                     | <b>120 m V (vs Ag/AgCl)</b>          |
| <b>Lin <i>et al</i><sup>32</sup></b>  | <b>Thermal chemical vapor deposition method (CVD)</b> | <b>16</b>          | <b>2</b>                       | <b>200 (vs Ag/AgCl)</b>              |
| <b>Present study</b>                  | <b>Thermal annealing</b>                              | <b>9</b>           | <b>3.2</b>                     | <b>90 (vs Hg/HgO)</b>                |

*The reference numbers are as given in the manuscript.*
